# Supplementary material for: KF-mediated controlled-synthesis of potassium ytterbium fluorides (doped with Er3+) with phase-dependent upconversion luminescence
Source: Royal Society of Chemistry journal article supplement (doi:10.1039/c5ce01363a), 2015-01-01
Supplement: c5ce01363a1.pdf [file c5ce01363a1.pdf]

*Supporting information for*

KF-mediated controlled-synthesis of potassium ytterbium fluorides (doped with  $\text{Er}^{3+}$ )  
with phase-dependent upconversion luminescence

Mingye Ding,<sup>a</sup> Fei Zhu,<sup>a</sup> Danyang Ma,<sup>a</sup> Xiaoyong Huang,<sup>\*b</sup> Peng Liu,<sup>c</sup> Kaixin Song,<sup>c</sup> Jiasong Zhong,<sup>a</sup> Junhua Xi,<sup>a</sup>  
Zhenguo Ji,<sup>a</sup> Daqin Chen<sup>\*a</sup>

<sup>a</sup> College of Materials & Environmental Engineering, Hangzhou Dianzi University, Hangzhou, 310018 P. R. China

<sup>b</sup> Key lab of Advanced Transducers and Intelligent Control System, Ministry of Education and Shanxi Province,  
College of Physics and Optoelectronics, Taiyuan University of Technology, Taiyuan 030024, P. R. China

<sup>c</sup> College of Electronic Information and Engineering, Hangzhou Dianzi University, Hangzhou, 310018 P. R. China

E-mail address: dqchen@hdu.edu.cn (D. Chen), huangxy04@126.com (X. Huang).

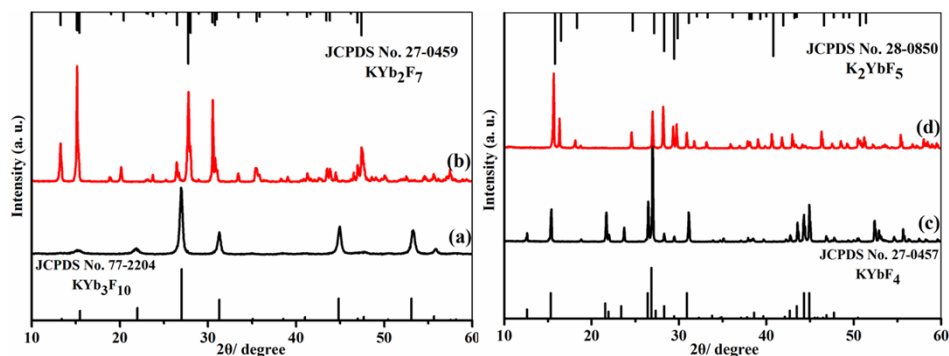

Fig. S11 XRD patterns of potassium ytterbium fluorides synthesized with different molar ratio of KF to  $\text{Ln}^{3+}$  ( $\text{Ln} = \text{Yb}, \text{Er}$ ): (a)  $\text{KF}/\text{Ln}^{3+} = 3$ , (b)  $\text{KF}/\text{Ln}^{3+} = 12.5$ , (c)  $\text{KF}/\text{Ln}^{3+} = 20$  and (d)  $\text{KF}/\text{Ln}^{3+} = 50$ . The standard data of  $\text{KYb}_3\text{F}_{10}$  (JCPDS No. 77-2204),  $\text{KYb}_2\text{F}_7$  (JCPDS No. 27-0459),  $\text{KYbF}_4$  (JCPDS No. 27-0457) and  $\text{K}_2\text{YbF}_5$  (JCPDS No. 28-0850) are given as references.

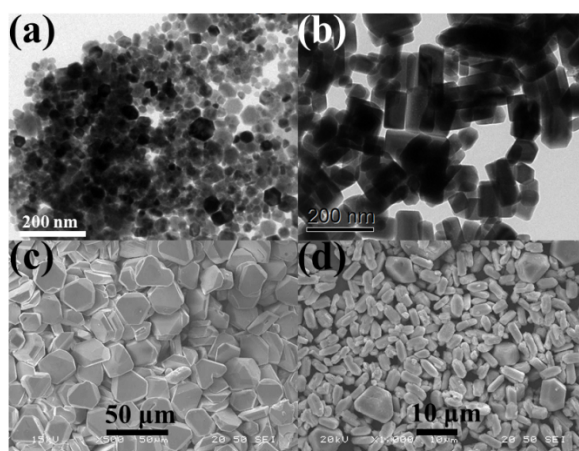

Fig. S12 SEM images of potassium ytterbium fluoride samples synthesized with different molar ratio of KF to  $\text{Ln}^{3+}$  ( $\text{Ln} = \text{Yb}, \text{Er}$ ): (a)  $\text{KF}/\text{Ln}^{3+} = 3$ , (b)  $\text{KF}/\text{Ln}^{3+} = 12.5$ , (c)  $\text{KF}/\text{Ln}^{3+} = 20$  and (d)  $\text{KF}/\text{Ln}^{3+} = 50$ .

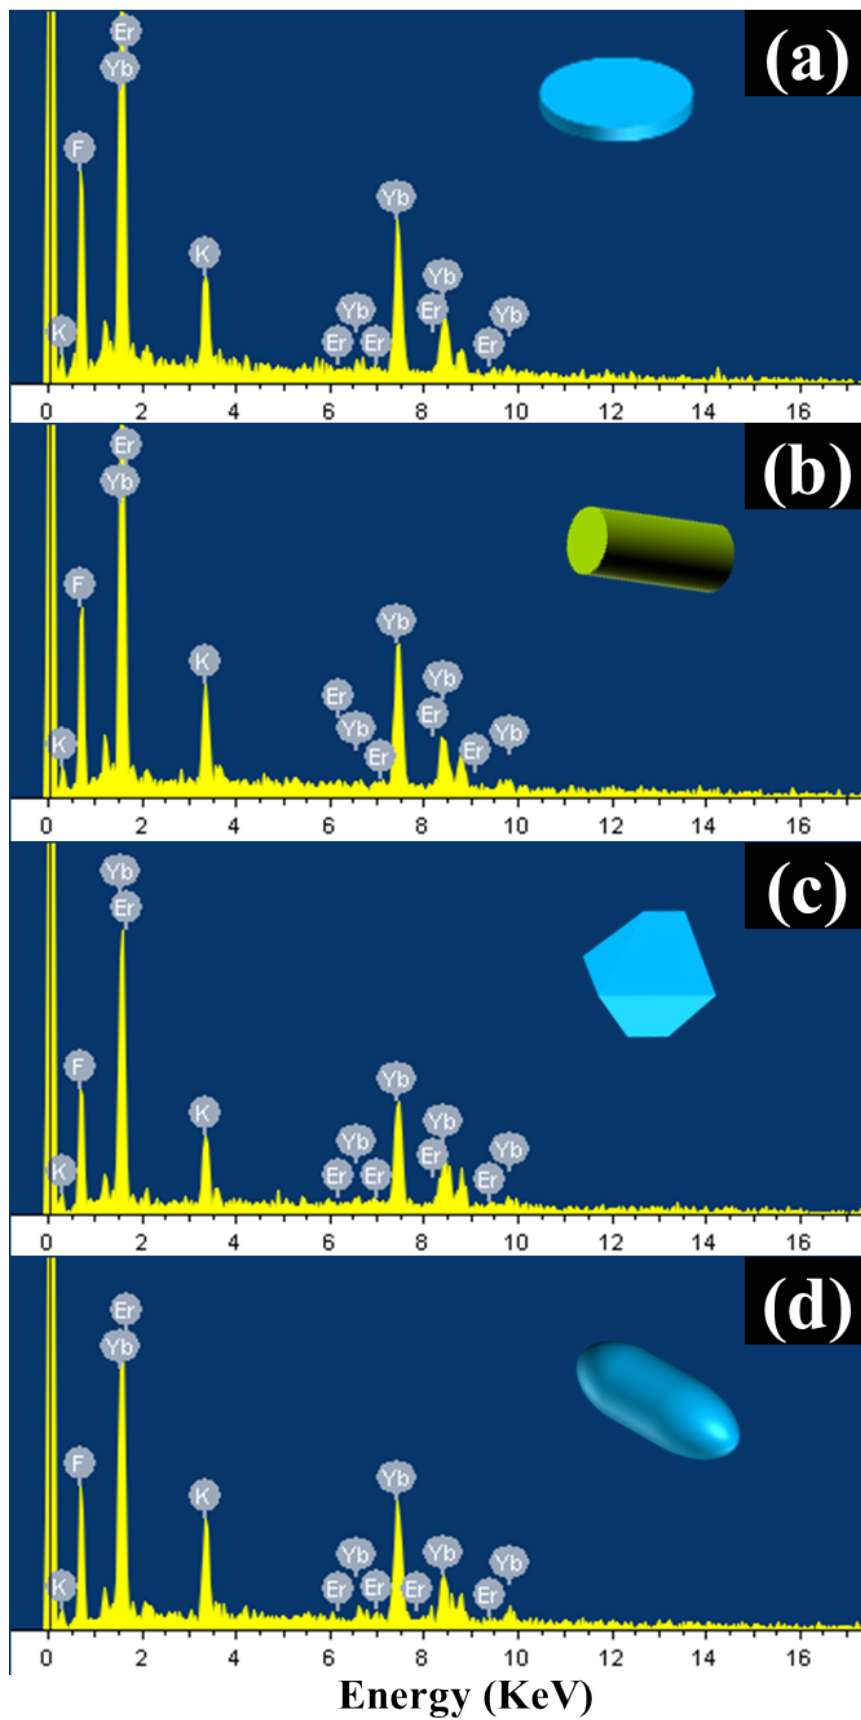

Fig. S13 The EDS spectra of potassium ytterbium fluoride samples synthesized with different molar ratio of KF to Ln<sup>3+</sup> (Ln = Yb, Er): (a) KF/Ln<sup>3+</sup> = 3, (b) KF/Ln<sup>3+</sup> = 12.5, (c) KF/Ln<sup>3+</sup> = 20 and (d) KF/Ln<sup>3+</sup> = 50.

Table S11 EDS analysis results of sample S1, S2, S3 and S4.

| Sample | KF/Ln <sup>3+</sup> | K (at%) | Yb (at%) | Er (at%) | F (at%) |
|--------|---------------------|---------|----------|----------|---------|
| S1     | 3                   | 6.8     | 21.54    | 0.63     | 71.03   |
| S2     | 12.5                | 9.22    | 23.91    | 0.56     | 66.31   |
| S3     | 20                  | 16.56   | 15.56    | 0.32     | 67.56   |
| S4     | 50                  | 21.02   | 15.01    | 0.35     | 65.42   |

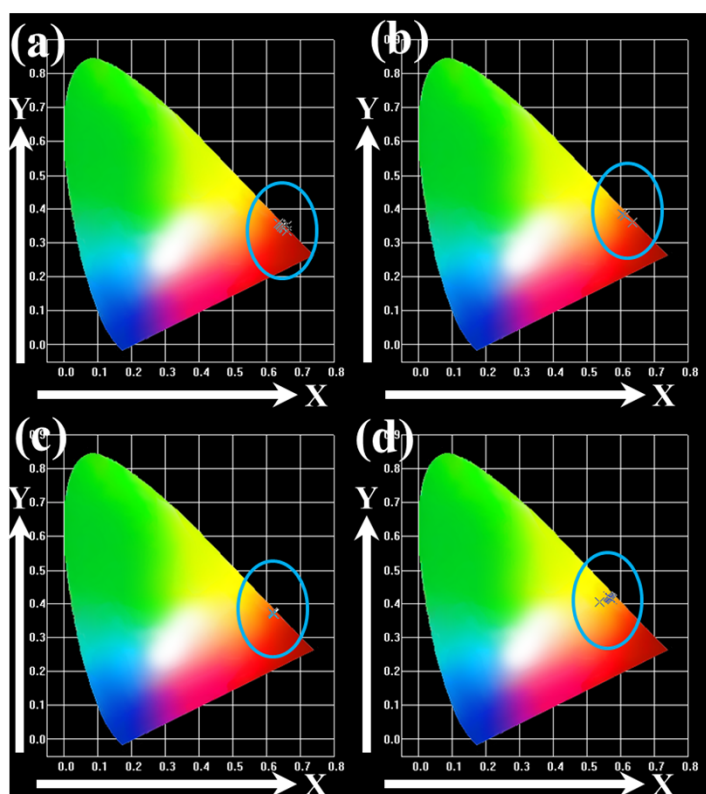

Fig. S14 The CIE chromaticity coordinates of sample S1, S2, S3 and S4 under 980 nm laser excitation with different excitation power at the range of 50 to 500 mW.
